# Supplementary material
Source: Springer Nature journal article supplement (https://www.springermedizin.de/resource/supplementary/12904_2008_55_MOESM3_ESM.pdf/9518044)

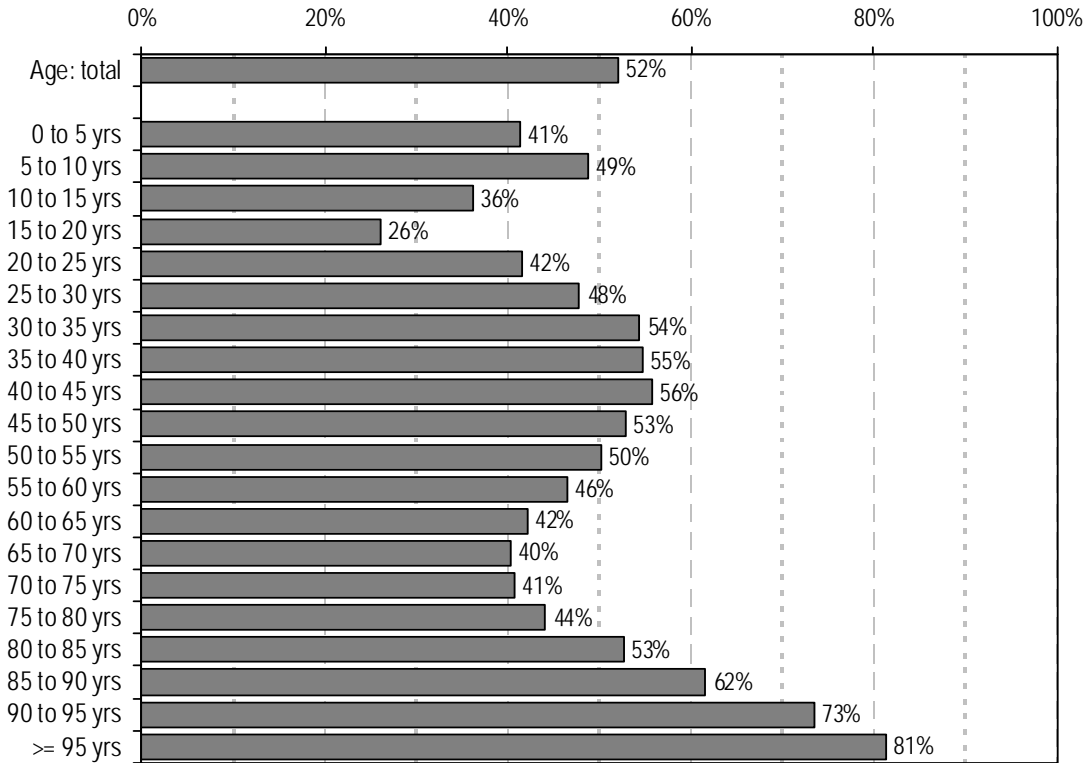

■ % Females among deaths from chr. diseases in 2006 (N = 77,366)

Supplement: MOESM3 [file 9518044]
